# Supplementary material for: Lattice–Interface Synergy in NiFe-Layered Double Hydroxide on Co, La Doped CeO₂ for Efficient Oxygen Evolution Reaction
Source: Research Square preprint supplement (doi:10.21203/rs.3.rs-8471560/v1), 2026-01-13
Supplement: Supplementary file 1 [file 206b53be67df75b4432b46bd.docx]

## **Supporting information**

## Jun Wang1,Wen Liu1*,Weihua Ji2*,Yang Miao2*,Yijie Wang3*, Zhenhao Zong1, Haoming Ma1 and Lingling Zhou4

1College of Chemical Engineering and Technology, Taiyuan University of Science and Technology, Taiyuan 030024, China

2College of Materials Science and Engineering, Taiyuan University of Technology,Taiyuan 030024, China

3Beijing Advanced Innovation Center for Materials Genome Engineering, State Key Laboratory for Advanced Metals and Materials, University of Science and Technology Beijing, Beijing 100083, China

4State Key Laboratory of Nonlinear Mechanics, Institute of Mechanics, Chinese Academy of Sciences, Beijing 100190, China

***Corresponding author.**

**E-mail address:** 13700509372@163.com(W.Liu), jiweihua@tyut.edu.cn(W.Ji),

miaoyang198781@163.com(Y.Miao), wangyijie_2016@126.com(Y.Wang).


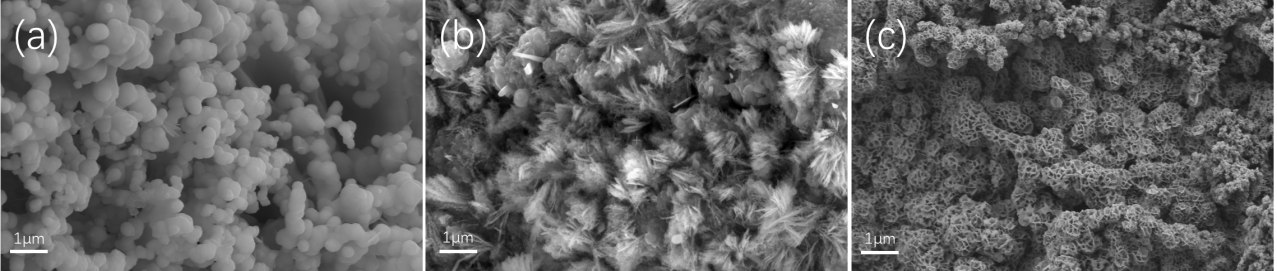


**Fig. S1** SEM images of as-synthesized (a)CeO2/CF, (b)Co-CeO2/CF and (c)NiFe-LDH/CF


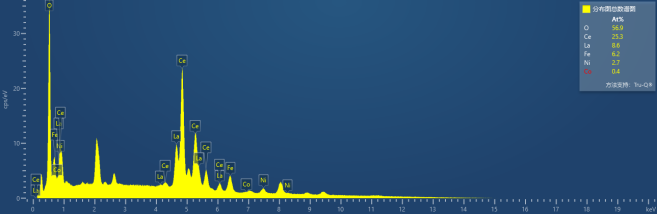


**Fig. S2** EDS elemental mapping of NiFe-LDH/Co,La-CeO2/CF


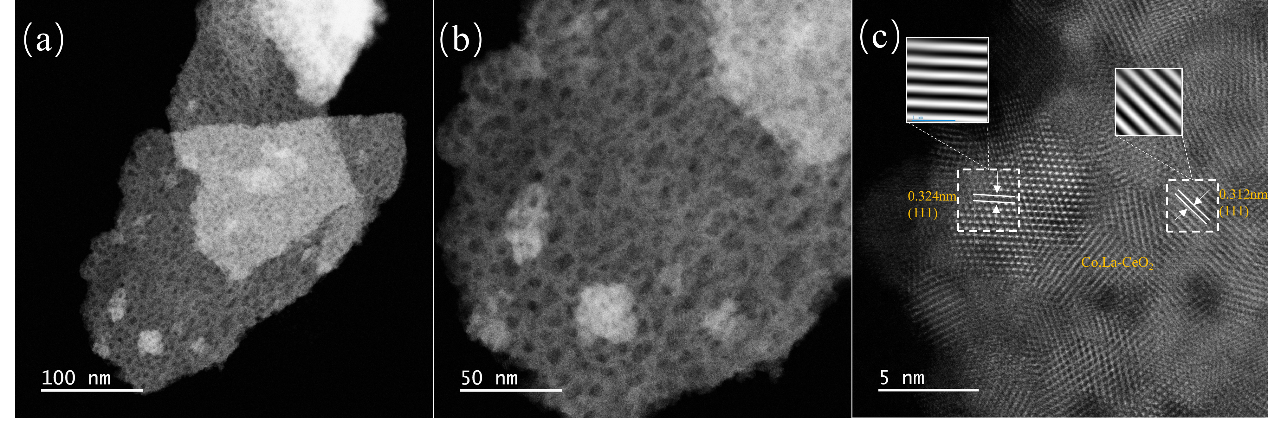


**Fig. S3** TEM images of (a,b) Co,La-CeO₂ and HRTEM images of (c) Co,La-CeO₂


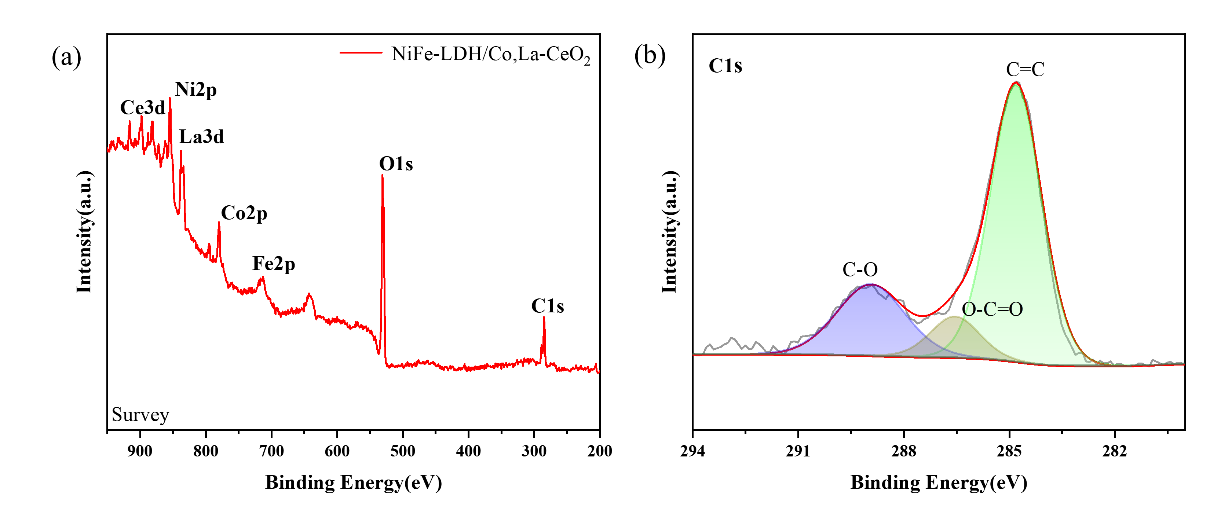


**Fig. S4** (a) Full XPS spectrum of NiFe-LDH-Co,La-CeO2/CF; (b) XPS maps of NiFe-LDH/Co,La-CeO2/CF, C 1s

**Synthesis of RuO₂ as a Commercial Catalyst**

Disperse 5 mg of catalyst sample into a mixture containing 490 µL ethanol, 490 µL ultrapure water, and 20 µL Nafion (5 wt%) solution. Ultrasonicate for 1 hour to obtain a uniformly dispersed catalyst solution. Apply by pipetting.


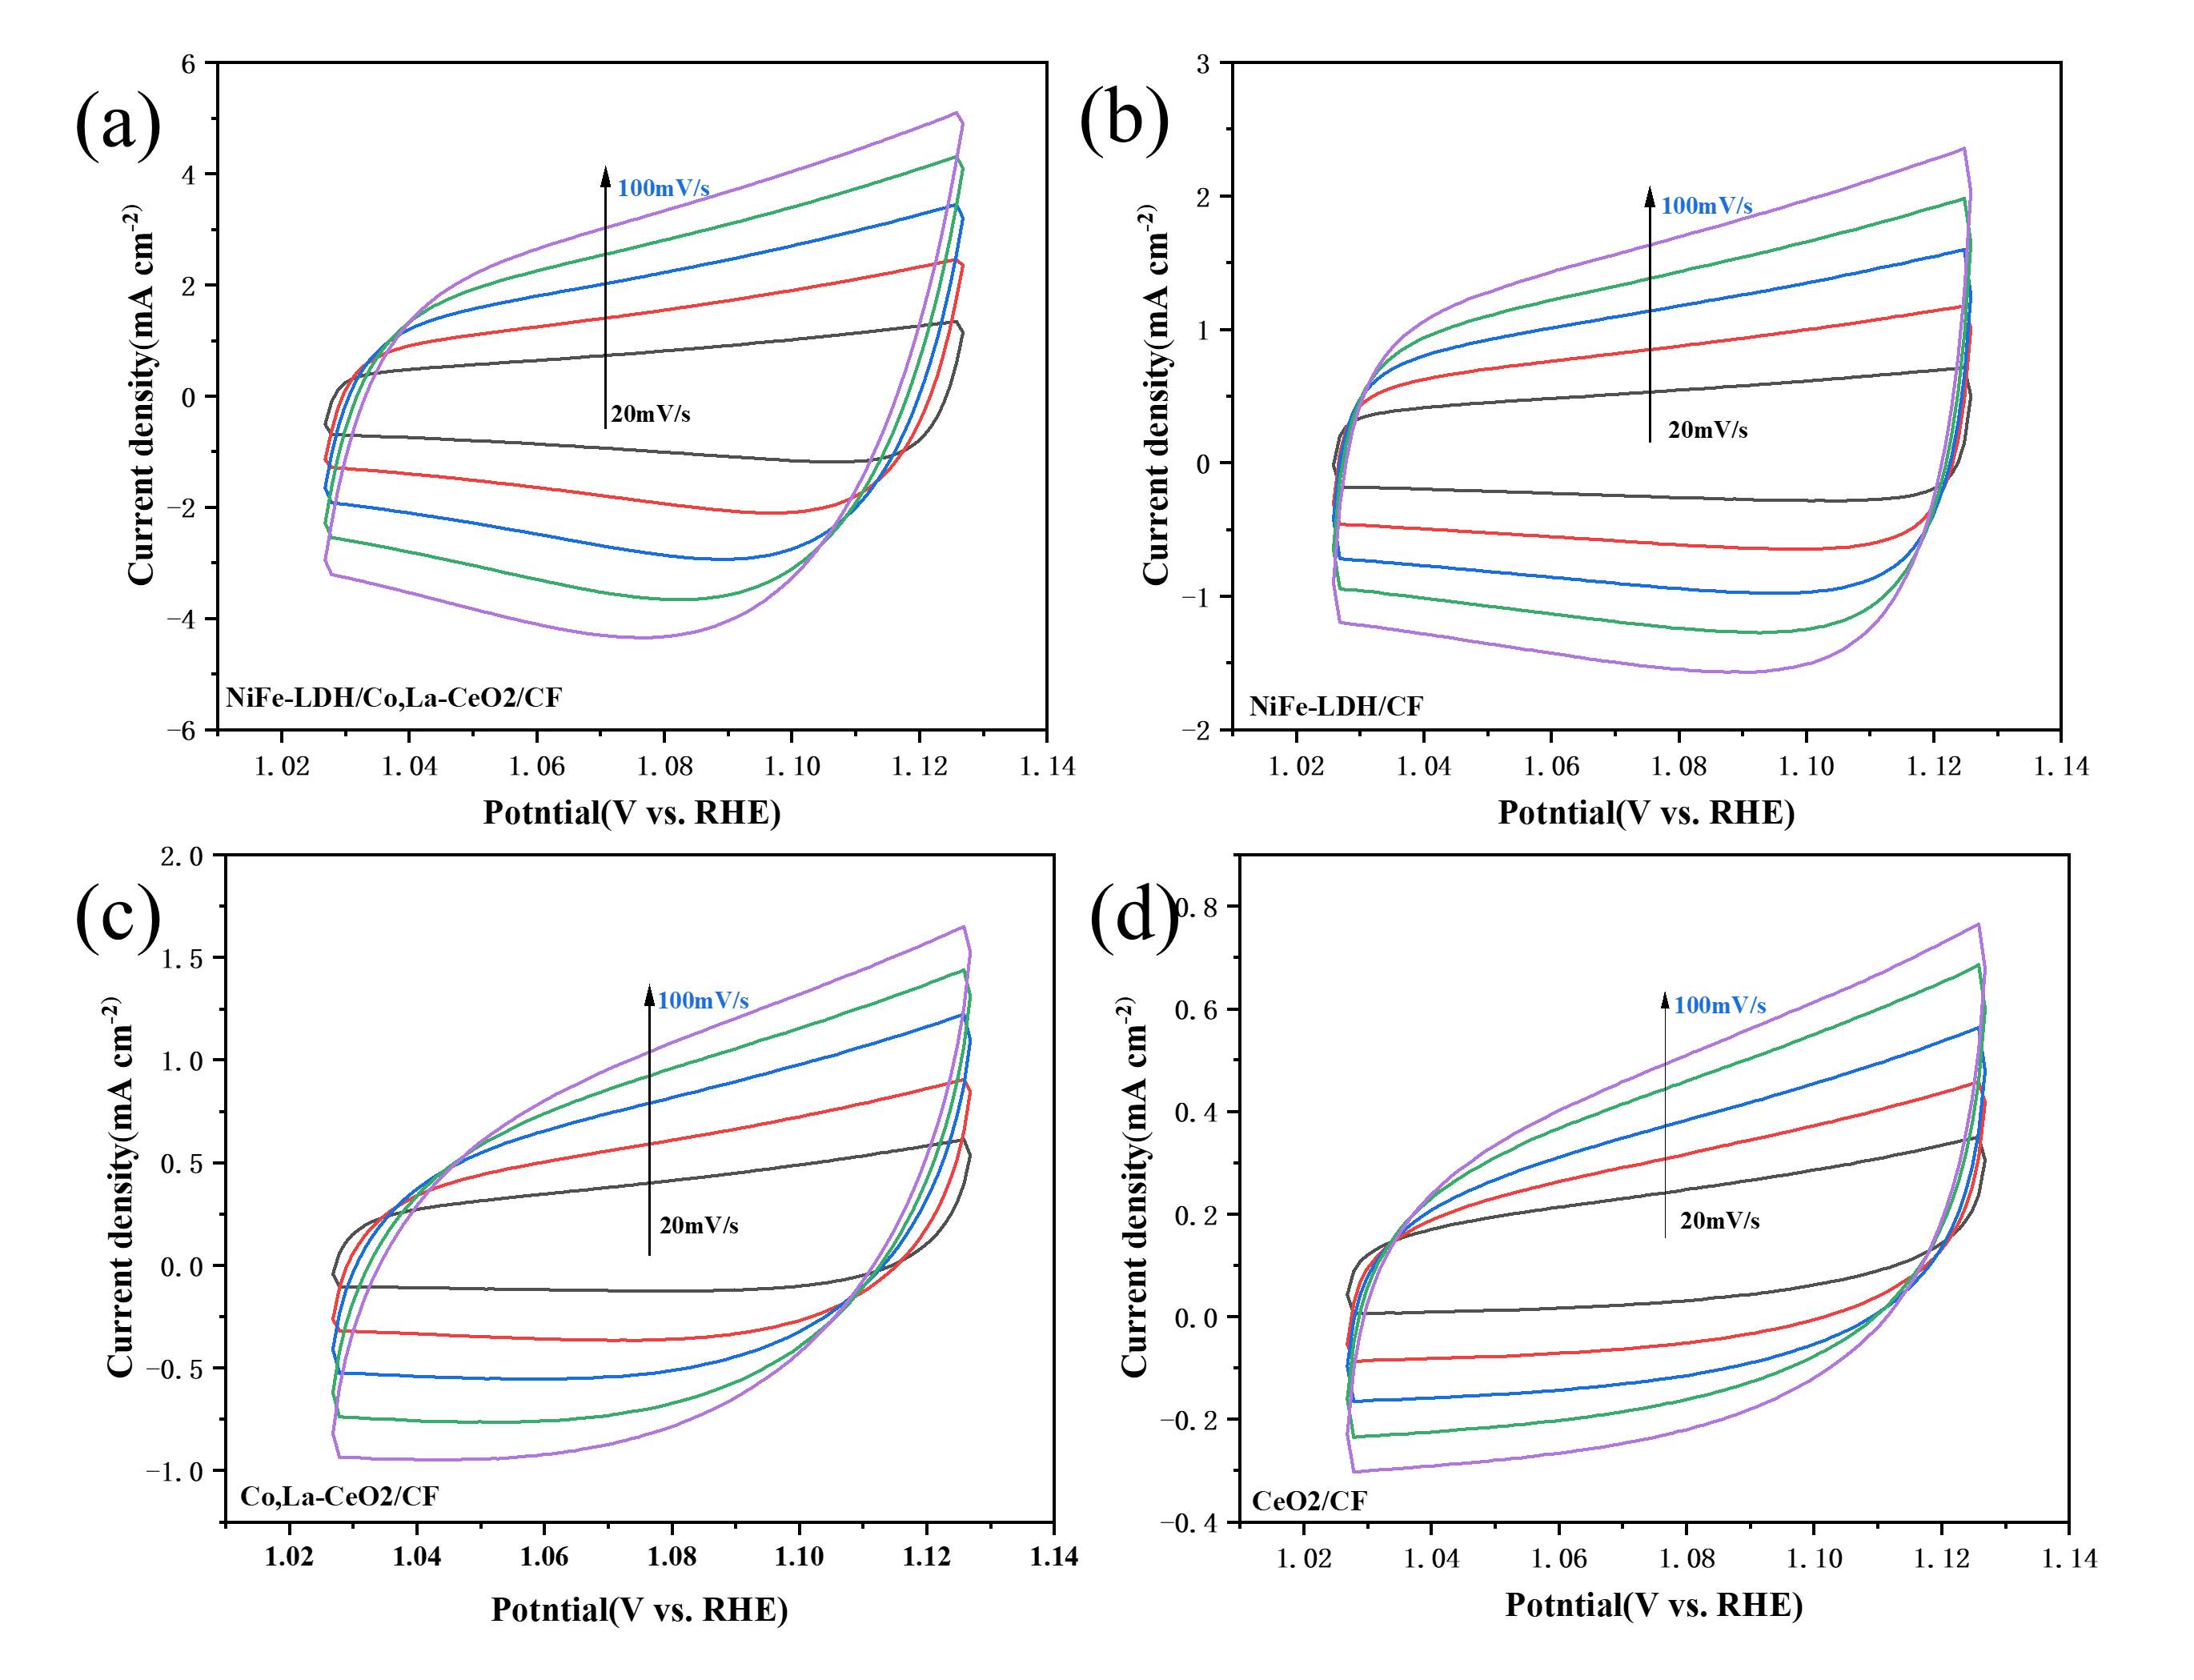


Fig. S5 Voltampere-cycle curves of different samples (a) NiFe-LDH/Co,La-CeO2/CF, (b) NiFe-LDH/CF, (c)Co,La-CeO2/CF, (d)CeO2/CF

**Table S1** Comparison of OER performance of NiFe-LDH/Co,La-CeO2/CFwith reported electrocatalysts

| Catalyst | j (mA cm-2) | η (mV) | Electrolysts | | Reference |
| --- | --- | --- | --- | --- | --- |
| NiFe-LDH/Co,La CeO2/CF | 50 | 230 | 1 M KOH | This work | |
| 10 | 172 |
| NiFe-LDH/Co/C@NF | 50 | 244 | 1 M KOH | [1] | |
| 10 |  |
| NiFeLDH/NiCoP@NC/NF | 50 |  | 1 M KOH | [2] | |
| 10 | 210 |
| [Ce-CoP@CC](mailto:Ce-CoP@CC) | 50 |  | 1 M KOH | [3] | |
| 10 | 240 |
| NiFeCe-LDH@CP | 50 | 255 | 1 M KOH | [4] | |
| 10 | 232 |
| Co3O4@NiFe-LDH/NF | 50 | 270 | 1 M KOH | [5] | |
| 10 |  |
| CoP/CeO2-20 | 50 | 298 | 1 M KOH | [6] | |
| 10 | 257 |
| 2% Gd-CeO2 | 50 |  | 1 M KOH | [7] | |
| 10 | 369 |
| Ce(OH)3@NiFe LDH | 50 |  | 1 M KOH | [8] | |
| 10 | 220 |
| Ce-Ni3S2/MnS/NF | 50 | 245 | 1 M KOH | [9] | |
| 10 | 194 |
| S-FeCoNiOx | 50 |  | 1 M KOH | [10] | |
| 10 | 221 |

**Table S2** The resistance value in the analog circuit of each catalyst in the OER test

| Sample | Rs (Ω cm-2) | Rct (Ω cm-2) |
| --- | --- | --- |
| NiFe-LDH/Co,La-CeO₂/CF | 1.2 | 0.47 |
| Co,La-CeO₂/CF | 1.18 | 3.27 |
| NiFe-LDH/CF | 1.28 | 1.94 |
| CeO₂/CF | 1.37 | 7.57 |

**References**

1. Liu,Changwen,et al."NiFe-LDH/co/C@NF composite electrocatalyst with enhanced oxygen evolution reaction performance".Solid State Communications,vol.401,2025,pp.115939. https://doi.org/10.1016/j.ssc.2025.11 5939
2. J. Nie, M. Hong, X. Zhang, J. Huang, Q. Meng, C. Du, J. Chen, 3D amorphous NiFe LDH nanosheets electrodeposited on in situ grown NiCoP@NC on nickel foam for remarkably enhanced OER electrocatalytic performance, Dalton Trans. 49 (2020) 4896-4903. https://doi.org/10.1039/C9DT04888J
3. Li M, Wang X, Liu K, Zhu Z, Guo H, Li M, et al. Ce-Induced differentiated regulation of Co sites via gradient orbital coupling for bifunctional water-splitting reactions.Advanced Energy Materials. 2023; 13: 2301162. https://doi.org/10.10 02/aenm.202301162
4. Liao, Y., He, R., Pan, W., Li, Y., Wang, Y., Li, J. & Li, Y. (2023). Lattice distortion induced Ce-doped NiFe-LDH for efficient oxygen evolution. Chemical Engineering Journal, 464(), 142669. https://doi.org/10.1016/j.cej.2023.142669
5. Liu, Z., Yuan, H., Wan, Z., Ma, Z., Deng, X. & Wang, X. (2024). Nanostructured Co3O4@NiFe-LDH heterojunction catalysts for improving oxygen evolution reaction in alkaline environment. Journal of Alloys and Compounds, 983(), 173837. https://doi.org/10.1016/j.jallcom.2024.173837
6. Ding, X., Huang, Y., Chen, D. & Xie, Z. (2023). CeO2 nanoparticles-decorated CoP nanocubes for accelerating alkaline electrocatalytic oxygen evolution reaction. Particuology, 81(), 38-44. https://doi.org/10.1016/j.partic.2022.12.012
7. Swathi, S., Yuvakkumar, R., Senthil, P., Ravi, G., Thambidurai, M., Dang, C. & Velauthapillai, D. (2022). Gadolinium doped CeO2 for efficient oxygen and hydrogen evolution reaction. Fuel, 310(), 122319. https://doi.org/10.1016/j.fuel.2 021.122319
8. Fan J, Du X. Role of Ce in the enhanced performance of the water oxidation reaction and urea oxidation reaction for NiFe layered double hydroxides[J]. Dalton Transactions, 2022, 51(21): 8240-8248. https://doi.org/10.1039/d2dt0086 2a
9. LIU Z, GAO N, GONG Y. Synthesis of ultrathin nanosheet Ce-Ni3S2/MnS/NF for efficient oxygen evolution catalyst[J/OL]. International Journal of Hydrogen Energy, 2025, 99: 707-715. https://doi.or g/10.1016/j.ijhydene.2024.12.234
10. Yanghanqi L, Wanyu L, Nannan Z, Jie L, Zhengying W, Caiqin W, et al. Sulfur-doped FeCoNiOx nanosheets improve their catalytic oxygen evolution reaction performance. International Journal of Hydrogen Energy. 2024;95:832-839.
    https://doi.org/10.1016/j.ijhydene.2024.11.286
